# Supplementary material
Source: publisher figshare collection journal article supplement (https://wiley.figshare.com/ndownloader/files/7531804)
Supplement: Supplementary file 1 [file 7531804]

## Sheet: Exp 1a
ID	genotype	sex	%alternation - pre-drug training phase (30 trials)	%alternation - vehicle (10 trials)	%alternation - LY35474 15mg/kg (10 trials)	mean sample latency (s) - vehicle	mean sample latency (s) - LY35474 15mg/kg	mean choice latency (s) - vehicle	mean choice latency (s) - LY35473 15mg/kg
A1	Gria1-/-	m	46.6667	70	60	4.8	5.2	4.1	4.8
A2	Gria1-/-	m	56.6667	60	40	4.3	3.5	1.8	2.5
B2	Gria1-/-	m	46.6667	60	90	5	3.3	3.7	3.1
C1	Gria1-/-	m	56.6667	50	50	3.1	3.5	3.4	3
F1	Gria1-/-	m	60	80	70	3.1	4	3	2.8
G1	Gria1-/-	m	50	70	50	4.7	4.5	4.1	3.7
G2	Gria1-/-	m	50	60	50	3.8	4.9	3	5.8
K1	Gria1-/-	m	53.3333
H1	Gria1-/-	f	56.6667	70	60	4.7	6.4	6.6	5.7
H3	Gria1-/-	f	40	60	60	3.4	3.2	2.7	3.2
I1	Gria1-/-	f	56.6667	60	40	2.7	3.8	2.1	2.2
I2	Gria1-/-	f	53.3333	50	70	5.7	5.1	6.2	3.8
I3	Gria1-/-	f	50	50	80	4.1	5.2	2.8	3.2
J1	Gria1-/-	f	70	60	70	2.1	2.6	1.2	1.7
J2	Gria1-/-	f	50	70	80	2.4	2.3	1.8	1.9
A3	WT	m	83.3333	70	70	3.9	2.9	2.5	1.7
A4	WT	m	73.3333	80	70	2.5	3.1	1.9	2.2
B1	WT	m	76.6667	90	90	2.4	2.6	2.1	1.9
E1	WT	m	56.6667	60	60	2.5	2.3	1.6	1.1
E2	WT	m	53.3333	70	80	2	2.3	1.5	1.4
H2	WT	f	76.6667	60	80	2	2.1	2	1.7
H4	WT	f	76.6667	80	60	2.3	2.4	1.3	2.2
H5	WT	f	66.6667	40	60	3.2	4.1	1.7	3
H6	WT	f	56.6667	50	70	3.5	3.5	2.2	3.2
I4	WT	f	80	90	90	3.7	3	2	1.8
I5	WT	f	80	90	60	2.7	3.1	2.3	2.1

## Sheet: Exp 1b
ID	genotype	sex	%alternation - pre-drug training phase (30 trials)	%alternation - vehicle (10 trials)	%alternation - LY35474 30mg/kg (10 trials)	mean sample latency (s) - vehicle	mean sample latency (s) - LY35474 30mg/kg	mean choice latency (s) - vehicle	mean choice latency (s) - LY35473 30mg/kg
5.3	WT	m	83.3333	90	90	2.6	4.1	1.8	2.6
6.2	WT	m	86.6667	70	80	3.1	3.8	2.3	3
6.4	WT	m	80	60	70	2.6	3.9	1.3	2.3
9.2	WT	m	80	90	90	5	3.9	2.7	1.8
11.1	WT	m	80	90	70	5.9	61.8	6.5	32.4
11.2	WT	m	86.6667	80	80	9.3	32.2	12.5	26.9
11.3	WT	m	70	100	90	9.2	42.1	15.9	41.5
6.1	Gria10-/-	m	40	80	50	2.6	3.8	1.3	2.1
6.3	Gria10-/-	m	46.6667	50	30	3.7	5.6	2.1	3.3
7.2	Gria10-/-	m	40	60	60	2.6	3.1	1.8	2.3
7.3	Gria10-/-	m	50	70	40	3.4	4	2	2.6
8.2	Gria10-/-	m	50	70	60	3.4	6	2.3	3.5
8.3	Gria10-/-	m	43.3333	50	70	2.5	2.9	1.3	1.9
10.1	Gria10-/-	m	56.6667	50	50	3.6	4.2	2.2	2.2

## Sheet: Exp 1c
ID	genotype	sex	%alternation - vehicle (10 trials)	%alternation - LY35474 30mg/kg (10 trials)	mean sample latency (s) - vehicle	mean sample latency (s) - LY35474 30mg/kg	mean choice latency (s) - vehicle	mean choice latency (s) - LY35473 30mg/kg
5.3	WT	m	70	40	2.7	3.15	1.75	2
6.2	WT	m	70	70	4.25	10.15	2.55	24.5
6.4	WT	m	90	70	3.5	5.7	2	4.75
9.2	WT	m	90	50	3.7	7.65	1.95	4.6
11.1	WT	m	90	60	4.5	16.7	3.4	28.5
11.2	WT	m	100	70	6.2	5.6	8	6.9
11.3	WT	m	40	80	8.35	66.9	10.8	69.6
6.1	Gria10-/-	m	80	40	5.25	3.45	2.1	1.9
6.3	Gria10-/-	m	70	40	3.35	3.6	1.75	2.9
7.2	Gria10-/-	m	20	70	2.4	3.1	1.5	2.05
7.3	Gria10-/-	m	50	50	3.6	5.9	2.6	13.2
8.2	Gria10-/-	m	30	30	3.15	13.55	1.85	4.3
8.3	Gria10-/-	m	50	50	3.4	3.45	1.3	2.2
10.1	Gria10-/-	m	50	60	2.65	6.85	1.25	3.75

## Sheet: Exp 2a
ID	genotype	sex	no. of beam breaks - bin 1 (15 min) - vehicle	no. of beam breaks - bin 2 (15 min) - vehicle	no. of beam breaks - bin 3 (15 min) - vehicle	no. of beam breaks - bin 4 (15 min) - vehicle	no. of beam breaks - bin 5 (15 min) - vehicle	no. of beam breaks - bin 6 (15 min) - vehicle	no. of beam breaks - bin 7 (15 min) - vehicle	no. of beam breaks - bin 8 (15 min) - vehicle	no. of beam breaks - bin 1 (15 min) - LY35474 15mg/kg	no. of beam breaks - bin 2 (15 min) - LY35474 15mg/kg	no. of beam breaks - bin 3 (15 min) - LY35474 15mg/kg	no. of beam breaks - bin 4 (15 min) - LY35474 15mg/kg	no. of beam breaks - bin 5 (15 min) - LY35474 15mg/kg	no. of beam breaks - bin 6 (15 min) - LY35474 15mg/kg	no. of beam breaks - bin 7 (15 min) - LY35474 15mg/kg	no. of beam breaks - bin 8 (15 min) - LY35474 15mg/kg
H2	WT	f	801	443	455	505	315	377	422	363	843	654	556	680	606	582	904	603
H4	WT	f	984	834	868	993	962	1137	927	908	266	537	462	333	381	370	278	202
H5	WT	f	2629	2567	2313	2149	1945	2173	1846	2102	1592	1830	1995	1643	1787	1463	1344	1394
H6	WT	f	2197	1262	1168	2026	1674	1869	1247	1477	495	930	960	1030	887	1173	1312	650
I4	WT	f	201	28	55	0	163	71	257	584	114	17	9	3	19	11	11	14
I5	WT	f	1339	1006	825	789	762	843	747	683	1165	673	703	639	410	519	311	156
A3	WT	m	560	565	517	475	620	506	612	483	420	431	576	592	660	532	428	671
A4	WT	m	714	448	652	172	581	537	343	454	469	454	522	525	309	493	18	303
B1	WT	m	1279	918	841	917	938	618	623	533	966	829	823	876	723	612	582	587
E1	WT	m	792	691	751	580	588	574	117	518	1069	657	829	494	344	483	236	97
E2	WT	m	1061	865	701	822	842	569	511	704	725	708	733	858	889	696	737	621
H1	Grai1-/-	f	1759	1412	1454	1185	1430	1327	1734	1661	999	1294	883	1586	1504	1754	1159	1348
H3	Grai1-/-	f	2088	1799	1444	1294	1499	816	624	735	705	178	483	596	515	417	404	455
I1	Grai1-/-	f	2882	2673	2083	1992	2202	2298	2185	2084	1756	1254	1817	1174	736	993	1170	412
I2	Grai1-/-	f	2561	2653	1857	1469	1201	1583	1716	1623	860	1014	869	1306	1402	1718	1844	1964
I3	Grai1-/-	f	1885	1240	1385	1679	1283	1611	1707	1531	95	46	84	19	43	58	19	106
J1	Grai1-/-	f	869	760	564	645	690	760	995	761	652	566	996	943	847	897	817	810
J2	Grai1-/-	f	1233	703	725	582	518	374	14	437	1334	1097	1004	850	948	882	684	1120
A1	Grai1-/-	m	1256	832	538	530	729	898	519	389	2388	1666	1391	1318	1318	1302	733	1055
A2	Grai1-/-	m	1809	1646	1536	1371	1373	1429	1052	1425	656	933	657	344	225	372	105	37
B2	Grai1-/-	m	1928	1203	1155	768	865	688	539	737	2570	2542	2227	1877	1791	1053	1274	1344
C1	Grai1-/-	m	3046	1759	1033	1398	1248	1110	687	1467	528	756	1167	1242	880	792	433	330
F1	Grai1-/-	m	1872	1627	1998	1356	1232	1885	1290	1304	1210	1315	1113	1713	1694	1455	1067	827
G1	Grai1-/-	m	2082	1693	1571	1480	1418	1474	824	1035	1498	1272	667	1104	1420	963	1059	851
G2	Grai1-/-	m	1966	1717	1554	1338	1334	1076	624	530	722	474	212	128	1418	1694	950	330
K1	Grai1-/-	m	1422	452	228	280	308	358	449	288	2539	1426	919	617	778	603	812	534

## Sheet: Exp 2b
ID	genotype	sex	no. of beam breaks - bin 1 (15 min) - vehicle	no. of beam breaks - bin 2 (15 min) - vehicle	no. of beam breaks - bin 3 (15 min) - vehicle	no. of beam breaks - bin 4 (15 min) - vehicle	no. of beam breaks - bin 5 (15 min) - vehicle	no. of beam breaks - bin 6 (15 min) - vehicle	no. of beam breaks - bin 7 (15 min) - vehicle	no. of beam breaks - bin 8 (15 min) - vehicle	no. of beam breaks - bin 1 (15 min) - LY35474 30mg/kg	no. of beam breaks - bin 2 (15 min) - LY35474 30mg/kg	no. of beam breaks - bin 3 (15 min) - LY35474 30mg/kg	no. of beam breaks - bin 4 (15 min) - LY35474 30mg/kg	no. of beam breaks - bin 5 (15 min) - LY35474 30mg/kg	no. of beam breaks - bin 6 (15 min) - LY35474 30mg/kg	no. of beam breaks - bin 7 (15 min) - LY35474 30mg/kg	no. of beam breaks - bin 8 (15 min) - LY35474 30mg/kg
A1	WT	f	983	904	854	608	632	548	393	398	457	346	113	115	31	140	4	50
C4	WT	f	844	573	480	364	337	249	342	269	605	129	290	471	415	269	106	0
D1	WT	f	1532	1188	1263	984	1014	780	531	603	156	118	56	53	81	220	31	189
E1	WT	f	548	285	374	323	111	420	103	82	580	460	495	527	153	86	987	369
F1	WT	f	864	638	403	290	519	243	158	399	416	198	874	660	420	169	93	100
F2	WT	f	798	567	385	428	441	120	283	263	303	60	141	115	40	10	30	44
H1	WT	m	789	571	523	429	443	455	309	82	124	72	110	125	142	97	76	134
H2	WT	m	784	779	611	444	701	466	344	581	537	295	19	12	383	404	112	445
I1	WT	m	985	1068	770	825	655	523	473	430	265	197	108	438	764	229	212	30
I2	WT	m	780	555	490	657	420	630	605	384	416	41	137	41	36	35	17	1
J2	WT	m	1617	1794	1583	1466	1382	1224	1189	1427	935	5	14	62	4	202	456	308
K2	WT	m	1361	1098	788	556	754	535	668	470	706	37	541	285	1	11	20	68
B1	Gria1-/-	f	2572	2055	1765	1463	1487	1373	1388	1485	1339	396	103	58	22	44	858	831
C1	Gria1-/-	f	3045	2403	1852	1618	1619	1515	1354	1693	1484	698	1575	1364	1332	941	574	506
C2	Gria1-/-	f	2416	1765	1477	1360	1230	987	1088	1163	526	47	350	708	41	26	9	0
C3	Gria1-/-	f	1980	1510	1210	1189	1181	1052	999	1006	977	13	49	668	667	529	622	505
G1	Gria1-/-	f	2275	1810	2343	2011	880	789	735	598	466	277	689	297	108	32	119	43
G2	Gria1-/-	f	1204	905	804	567	424	575	258	420	873	702	542	305	404	202	19	400
J1	Gria1-/-	m	434	224	125	109	229	315	249	314	529	327	355	292	425	391	250	269
J3	Gria1-/-	m	859	718	613	608	488	438	455	561	120	35	45	95	34	161	57	0
K1	Gria1-/-	m	557	393	488	562	489	425	453	412	550	178	10	290	215	200	192	102
L1	Gria1-/-	m	2331	1347	1328	1173	1268	1241	1012	529	1278	56	13	10	8	966	1140	988
M1	Gria1-/-	m	2615	1976	1173	1099	824	612	735	617	381	177	136	138	977	901	91	1

## Sheet: Exp 2c
ID	genotype	sex	no. of beam breaks - bin 1 (15 min) - vehicle	no. of beam breaks - bin 2 (15 min) - vehicle	no. of beam breaks - bin 3 (15 min) - vehicle	no. of beam breaks - bin 4 (15 min) - vehicle	no. of beam breaks - bin 5 (15 min) - vehicle	no. of beam breaks - bin 6 (15 min) - vehicle	no. of beam breaks - bin 7 (15 min) - vehicle	no. of beam breaks - bin 8 (15 min) - vehicle	no. of beam breaks - bin 1 (15 min) - LY35474 30mg/kg	no. of beam breaks - bin 2 (15 min) - LY35474 30mg/kg	no. of beam breaks - bin 3 (15 min) - LY35474 30mg/kg	no. of beam breaks - bin 4 (15 min) - LY35474 30mg/kg	no. of beam breaks - bin 5 (15 min) - LY35474 30mg/kg	no. of beam breaks - bin 6 (15 min) - LY35474 30mg/kg	no. of beam breaks - bin 7 (15 min) - LY35474 30mg/kg	no. of beam breaks - bin 8 (15 min) - LY35474 30mg/kg
5.3	WT	m	822	420	337	248	293	337	394	127	2978	552	429	308	252	335	108	18	17	2019
6.2	WT	m	743	989	1233	1026	842	570	711	646	6760	311	178	298	376	344	137	181	65	1890
6.4	WT	m	491	463	284	102	264	157	104	18	1883	412	371	222	148	226	8	0	0	1387
9.2	WT	m	767	680	570	748	615	677	493	598	5148	326	392	309	102	172	37	19	25	1382
11.1	WT	m	960	1073	432	685	994	194	430	664	5432	728	1032	1088	1352	321	611	310	336	5778
11.2	WT	m	679	412	567	643	572	513	490	194	4070	278	309	128	210	73	74	0	0	1072
11.3	WT	m	831	735	906	519	271	598	340	340	4540	191	419	187	231	38	27	18	141	1252
6.1	Gria1-/-	m	2421	1974	2557	1871	1574	1475	1542	1766	15180	494	899	1924	1200	1430	1134	1031	1302	9414
6.3	Gria1-/-	m	1792	1517	1888	1720	1260	1822	1622	1665	13286	359	798	520	405	341	204	172	0	2799
7.2	Gria1-/-	m	1586	1878	1384	1616	1592	1022	1460	1175	11713	1029	1122	972	1469	1131	1030	1456	1027	9236
7.3	Gria1-/-	m	2651	2227	1855	1701	1452	1583	1513	1329	14311	582	1216	893	537	778	679	661	655	6001
8.2	Gria1-/-	m	2054	2586	1803	1895	1070	1643	1198	1113	13362	676	878	701	1254	1204	573	498	909	6693
8.3	Gria1-/-	m	1826	1248	1351	896	518	923	714	549	8025	317	352	529	429	123	369	65	23	2207
10.1	Gria1-/-	m	2179	1997	1613	1569	1453	1208	1068	1432	12519	1130	1012	1321	1108	1161	1048	788	64	7632

## Sheet: Exp 3
ID	genotype	sex	%alternation - pre-drug training phase (30 trials)	%alternation - saline (10 trials)	%alternation - haloperofol 0.3mg/kg (10 trials)	mean sample latency (s) - vehicle	mean sample latency (s) - haloperofol 0.3mg/kg	mean choice latency (s) - vehicle	mean choice latency (s) - haloperofol 0.3mg/kg
F1.1	Gria10-/-	f
F1.2	Gria10-/-	f	40	50	50	3.5	4.2	3	5.9
F1.3	Gria10-/-	f
F3.1	Gria10-/-	f	46.6667	50	50	3.6	3.7	2.8	5
F4.1	Gria10-/-	f	66.6667	60	40	30.3	71.6	24.6	38.4
F6.2	Gria10-/-	f	70	50	60	14.8	72.5	26.3	25.4
M11.1	Gria10-/-	m	56.6667	40	60	56	97.5	37.1	36.6
M12.1	Gria10-/-	m	40	60	50	2.6	3.4	1.2	3.1
M13.1	Gria10-/-	m	60	70	60	4.4	7	14.5	23.2
M14.1	Gria10-/-	m
M15.1	Gria10-/-	m	46.6667	50	60	4.3	13.8	4.8	38.2
M15.3	Gria10-/-	m	46.6667	70	50	3.5	4.3	2.1	7
F1.4	WT	f
F3.2	WT	f
F3.3	WT	f	56.6667	60	70	2.6	4.2	1.4	5.3
F4.2	WT	f	63.3333	60	50	9.2	24.1	13.2	48.3
F6.3	WT	f	63.3333	60	80	5.9	35.5	11.8	44.7
F6.4	WT	f	66.6667	70	60	7.7	55.5	12.9	66.8
M11.2	WT	m
M11.3	WT	m
M12.2	WT	m	93.3333	90	90	3.1	9.6	1.9	16
M13.2	WT	m	63.3333	100	100	3	5.4	2.9	7.1
M14.5	WT	m
M15.2	WT	m	80	70	90	8.5	27.2	12.5	47.5

## Sheet: Exp 4
ID	genotype	sex	drug	no. of beam breaks - bin 1 (15 min)	no. of beam breaks - bin 2 (15 min)	no. of beam breaks - bin 3 (15 min)	no. of beam breaks - bin 4 (15 min)	no. of beam breaks - bin 5 (15 min)	no. of beam breaks - bin 6 (15 min)	no. of beam breaks - bin 7 (15 min)	no. of beam breaks - bin 8 (15 min)
F1.1	Gria1-/-	f	saline	1068	715	612	685	513	609	292	295
F4.1	Gria1-/-	f	saline	681	693	688	704	686	500	593	270
F3.1	Gria1-/-	f	saline	1380	1405	1299	1033	911	844	936	967
M15.3	Gria1-/-	m	saline	754	586	590	575	573	525	498	295
M12.1	Gria1-/-	m	saline	586	512	545	462	612	585	427	317
M13.1	Gria1-/-	m	saline	611	513	566	626	558	483	408	417
F6.2	WT	f	saline	232	144	154	21	29	33	1	0
F1.2	WT	f	saline	396	190	168	146	84	18	0	6
F1.3	WT	f	saline	424	208	148	96	2	0	30	2
M11.1	WT	m	saline	156	57	93	88	41	21	0	0
M15.1	WT	m	saline	214	70	49	12	0	0	0	0
M14.1	WT	m	saline	301	149	50	9	0	32	22	67
F4.2	Gria1-/-	f	haloperidol 0.3mg/kg	367	218	288	204	179	86	2	11
F6.3	Gria1-/-	f	haloperidol 0.3mg/kg	369	464	524	441	321	298	249	273
F1.4	Gria1-/-	f	haloperidol 0.3mg/kg	215	188	247	194	37	0	3	48
M11.3	Gria1-/-	m	haloperidol 0.3mg/kg	394	296	373	315	139	246	71	9
M15.2	Gria1-/-	m	haloperidol 0.3mg/kg	450	476	322	416	586	382	469	193
M12.2	Gria1-/-	m	haloperidol 0.3mg/kg	508	379	355	347	253	96	6	11
F6.4	WT	f	haloperidol 0.3mg/kg	74	2	2	0	0	8	3	3
F3.2	WT	f	haloperidol 0.3mg/kg	60	54	25	23	0	4	0	5
F3.3	WT	f	haloperidol 0.3mg/kg	202	8	24	9	0	0	3	81
M11.2	WT	m	haloperidol 0.3mg/kg	76	15	11	0	0	18	0	1
M13.2	WT	m	haloperidol 0.3mg/kg	161	66	85	92	86	104	143	132
M14.5	WT	m	haloperidol 0.3mg/kg	54	14	0	4	0	0	22	55

## Sheet: AlternationAquisition (1a,1b,3)
Experiment	ID	genotype	sex	% alternation - block 1 (10 trials)	% alternation - block 2 (10 trials)	% alternation - block 3 (10 trials)
1a	H1	Gria1-/-	f	60	60	50
1a	H3	Gria1-/-	f	40	50	30
1a	I1	Gria1-/-	f	60	60	50
1a	I2	Gria1-/-	f	50	60	50
1a	I3	Gria1-/-	f	60	20	70
1a	J1	Gria1-/-	f	60	70	80
1a	J2	Gria1-/-	f	30	60	60
1a	A1	Gria1-/-	m	30	60	50
1a	A2	Gria1-/-	m	50	50	70
1a	B2	Gria1-/-	m	60	40	40
1a	C1	Gria1-/-	m	60	50	60
1a	F1	Gria1-/-	m	70	60	50
1a	G1	Gria1-/-	m	50	40	60
1a	G2	Gria1-/-	m	50	40	60
1a	K1	Gria1-/-	m	40	50	70
1a	H2	WT	f	70	80	80
1a	H4	WT	f	70	90	70
1a	H5	WT	f	80	70	50
1a	H6	WT	f	50	50	70
1a	I4	WT	f	70	80	90
1a	I5	WT	f	60	100	80
1a	A3	WT	m	70	90	90
1a	A4	WT	m	80	70	70
1a	B1	WT	m	80	60	90
1a	E1	WT	m	40	60	70
1a	E2	WT	m	50	60	50
1b	6.1	Gria10-/-	m	50	40	30
1b	6.3	Gria10-/-	m	40	40	60
1b	7.2	Gria10-/-	m	40	50	30
1b	7.3	Gria10-/-	m	40	50	60
1b	8.2	Gria10-/-	m	50	50	50
1b	8.3	Gria10-/-	m	50	30	50
1b	10.1	Gria10-/-	m	70	40	60
1b	5.3	WT	m	70	80	100
1b	6.2	WT	m	100	90	70
1b	6.4	WT	m	90	70	80
1b	9.2	WT	m	80	80	80
1b	11.1	WT	m	100	80	60
1b	11.2	WT	m	90	80	90
1b	11.3	WT	m	50	70	90
3	F1.1	Gria10-/-	f
3	F1.2	Gria10-/-	f	50	80	70
3	F1.3	Gria10-/-	f
3	F3.1	Gria10-/-	f	30	60	30
3	F4.1	Gria10-/-	f	70	70	40
3	F6.2	Gria10-/-	f	70	30	40
3	M11.1	Gria10-/-	m	60	60	50
3	M12.1	Gria10-/-	m	50	40	50
3	M13.1	Gria10-/-	m	30	50	60
3	M14.1	Gria10-/-	m
3	M15.1	Gria10-/-	m	60	50	70
3	M15.3	Gria10-/-	m	50	50	40
3	F1.4	WT	f
3	F3.2	WT	f
3	F3.3	WT	f	80	70	50
3	F4.2	WT	f	80	80	90
3	F6.3	WT	f	60	80	70
3	F6.4	WT	f	60	70	40
3	M11.2	WT	m
3	M11.3	WT	m
3	M12.2	WT	m	80	70	90
3	M13.2	WT	m	90	90	100
3	M14.5	WT	m
3	M15.2	WT	m	90	80	70
